# Supplementary material for: Accurate Simulation and Detection of Coevolution Signals in Multiple Sequence Alignments
Source: PLOS journal article supplement (doi:10.1371/journal.pone.0047108), 2012-10-16
Supplement: S20 (10.1371/journal.pone.0047108.s020) [file journal.pone.0047108.s020]

## Flowchart/pseudocode of the db, dgb, and nbZPX2 algorithms.

The first step in the application of these algorithms using MSAvolve is the conversion of a MSA from ascii format to MATLAB integers representation (1-20 for all aa's, 25 for gaps) , called here **NMSA**. This can be accomplished with two MSAvolve functions:

**aln\_to\_nmsa** (if the alignment is in Clustal format)

**faln\_to\_nmsa** (if the alignment is in Fasta format)

For example, at the Matlab prompt type:

```
[~,nmsa] = faln_to_nmsa(msa.fasta);
```

### ZPX2

1. Calculate the MI matrix for an MSA (function **NMSA\_to\_MI** in MSAvolve)

$$MI_{ij} = H_i + H_j - H_{ij}$$

2. Calculate the MIP values from the MI values (function **MI\_to\_MIP** in MSAvolve):

$$MIP_{ij} = MI_{ij} - (\overline{MI_i} \times \overline{MI_j} \div \overline{MI})$$

3. Calculate the ZPX2 values from the MIP values (function **MIP\_to\_ZPX** in MSAvolve):

$$ZPX2_{ij} = \frac{MIP_{ij} - \overline{MIP_i}}{\sigma MIP_i} \times \frac{MIP_{ij} - \overline{MIP_j}}{\sigma MIP_j}$$

If using MSAvolve, at the Matlab prompt type in sequence:

```
[MI] = NMSA_to_MI(nmsa);
```

```
[MIP] = MI_to_MIP(MI);
```

```
[~,ZPX2] = MIP_to_ZPX(MIP);
```

**dbZPX2** (function [NMSA\\_to\\_dbZPX2](#) in MSAvolve)

1. Calculate a distance matrix for the sequences of the msa.
2. Reorder the msa by placing as the 1<sup>st</sup> and 2<sup>nd</sup> row the two sequences most similar to each other.
3. Place in the 3<sup>rd</sup> row the sequence most similar to the sequence in the 2<sup>nd</sup> row.
4. Loop by placing in each consecutive row the sequence most similar to the sequence in the previous row, until the entire msa is reordered.
5. Convert the msa to 'binary differential': the 1<sup>st</sup> row is assigned all 0's. In each consecutive row a 0 is placed at every position at which the aa is the same as in the previous row, and a 1 at every position in which the aa is different.
6. Calculate the MI matrix for the 'binary differential' msa.
7. Calculate the positional covariance (COV) matrix for the 'binary differential' msa.
8. Scale MI and COV matrices by linear regression.
9. Sum scaled MI and COV matrices.
10. Calculate a ZPX2 matrix from the summed matrix.

If using MSAvolve, at the Matlab prompt type:

```
[dbZPX2] = NMSA_to_dbZPX2(nmsa);
```

**dgbZPX2** (function [NMSA\\_to\\_dgbZPX2](#) in MSAvolve)

1. Calculate a distance matrix for the sequences of the msa.
2. Reorder the msa by placing as the 1<sup>st</sup> and 2<sup>nd</sup> row the two sequences most similar to each other.
3. Place in the 3<sup>rd</sup> row the sequence most similar to the sequence in the 2<sup>nd</sup> row.
4. Loop by placing in each consecutive row the sequence most similar to the sequence in the previous row, until the entire msa is reordered.
5. Convert the msa to 'binary differential': the 1<sup>st</sup> row is assigned all 0's. In each consecutive row a 0 is placed at every position at which the aa is the same as in the previous row, and a 1 at every position in which the aa is different.
6. Calculate the MI matrix for the 'binary differential' msa.
7. Convert each row of the reordered msa to 'long binary' format in which every symbol (including gaps) is represented by a vector of twenty 0's and a single 1.
8. Convert the 'long binary' format msa to 'binary differential' as in step 5.
9. Calculate the positional covariance matrix (largeCOV) of the msa in 'long binary' format'.
10. Calculate the Frobenius norm of every submatrix of largeCOV that corresponds to the covariance between two columns of the reordered msa. This generates a positional covariance matrix (COV) of the reordered msa.
11. Scale MI and COV matrices by linear regression.
12. Sum scaled MI and COV matrices.
13. Calculate a ZPX2 matrix from the summed matrix.

If using MSAvolve, at the Matlab prompt type:

```
\[dgbZPX2\] = NMSA\_to\_dgbZPX2\(nmsa\);
```

**nbZPX2** (function [NMSA\\_to\\_nbZPX2](#) in MSAvolve)

1. Calculate a distance matrix for the sequences of the msa.
2. Reorder the msa by placing as the 1<sup>st</sup> and 2<sup>nd</sup> row the two sequences most similar to each other.
3. Place in the 3<sup>rd</sup> row the sequence most similar to the sequence in the 2<sup>nd</sup> row.
4. Loop by placing in each consecutive row the sequence most similar to the sequence in the previous row, until the entire msa is reordered.
5. Convert the msa to 'binary differential': the 1<sup>st</sup> row is assigned all 0's. In each consecutive row a 0 is placed at every position at which the aa is the same as in the previous row, and a 1 at every position in which the aa is different.
6. Go back to the reordered msa in standard format and change to 0 every position that is a 0 in the 'binary differential' msa: the result is the 'normal binary' msa or nb\_msa.
7. Calculate the MI matrix for the nb\_msa.
8. Calculate a ZPX2 matrix from the MI matrix.

If using MSAvolve, at the Matlab prompt type:

```
[nbZPX2] = NMSA_to_nbZPX2(nmsa);
```
